# Supplementary material for: One is not enough: On the effects of reference genome for the mapping and subsequent analyses of short-reads
Source: PubMed Central journal article supplement (PMC7870062; doi:10.1371/journal.pcbi.1008678), 2021-01-27

A

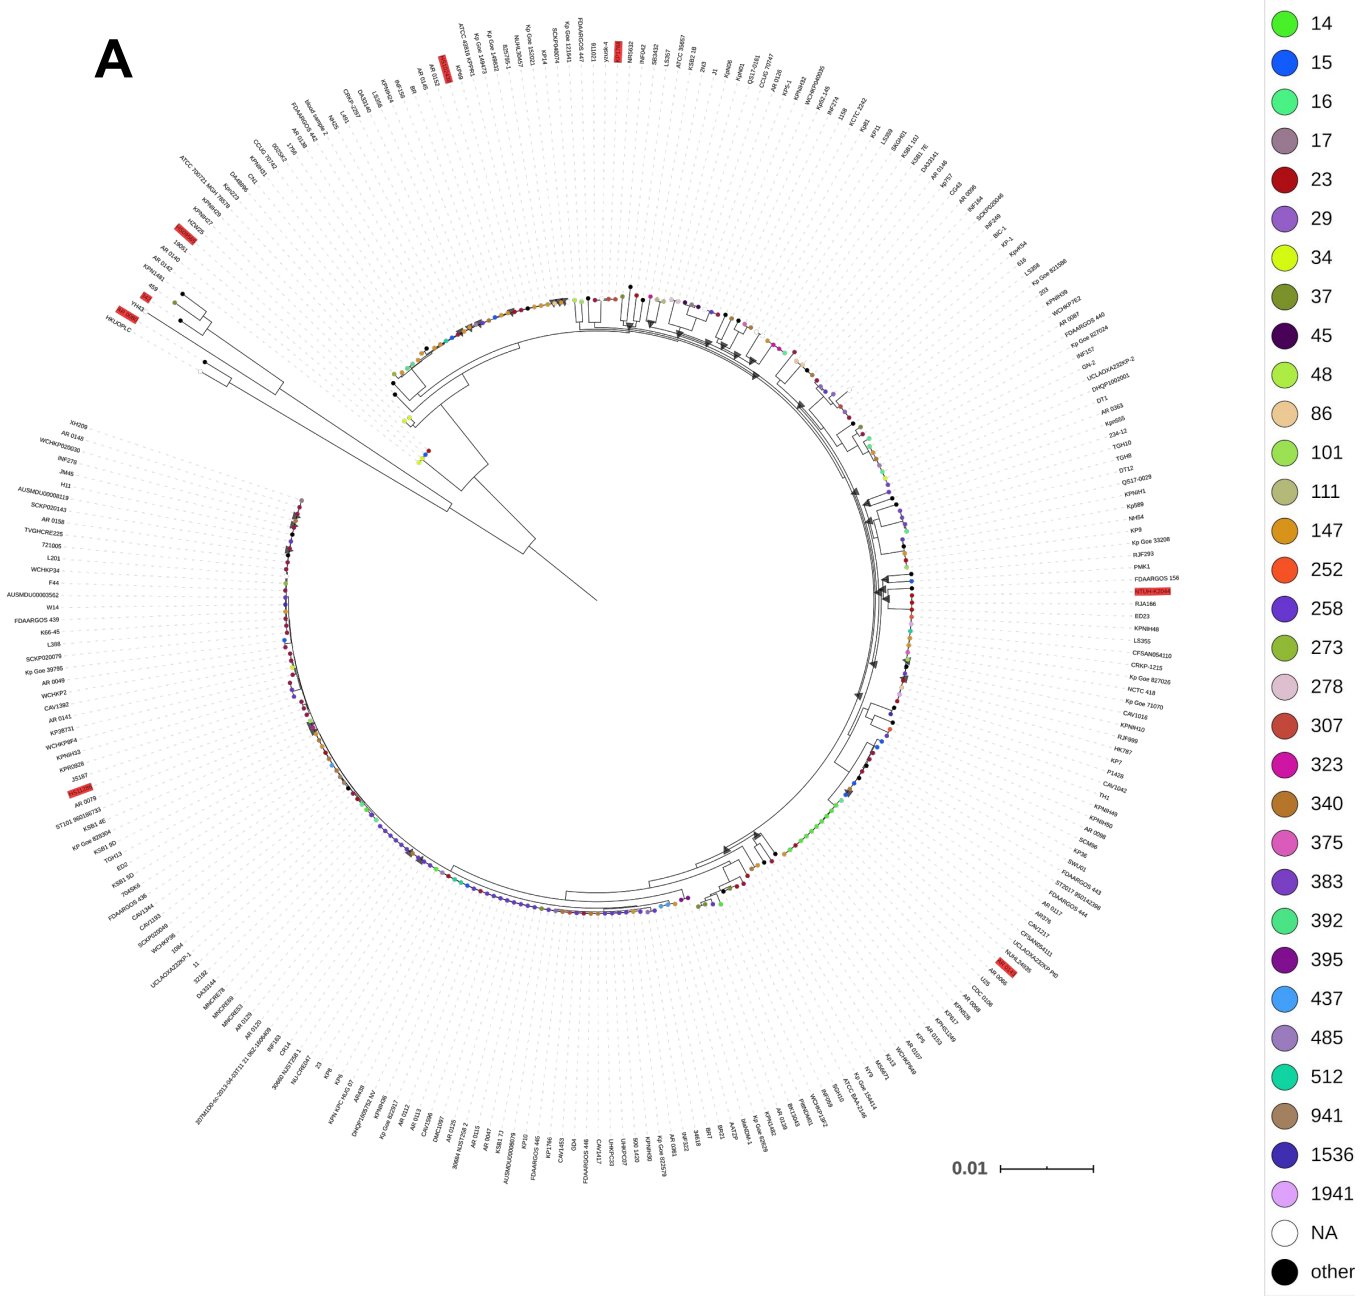

- ST**
- 11
  - 14
  - 15
  - 16
  - 17
  - 23
  - 29
  - 34
  - 37
  - 45
  - 48
  - 86
  - 101
  - 111
  - 147
  - 252
  - 258
  - 273
  - 278
  - 307
  - 323
  - 340
  - 375
  - 383
  - 392
  - 395
  - 437
  - 485
  - 512
  - 941
  - 1536
  - 1941
  - NA
  - other

**B**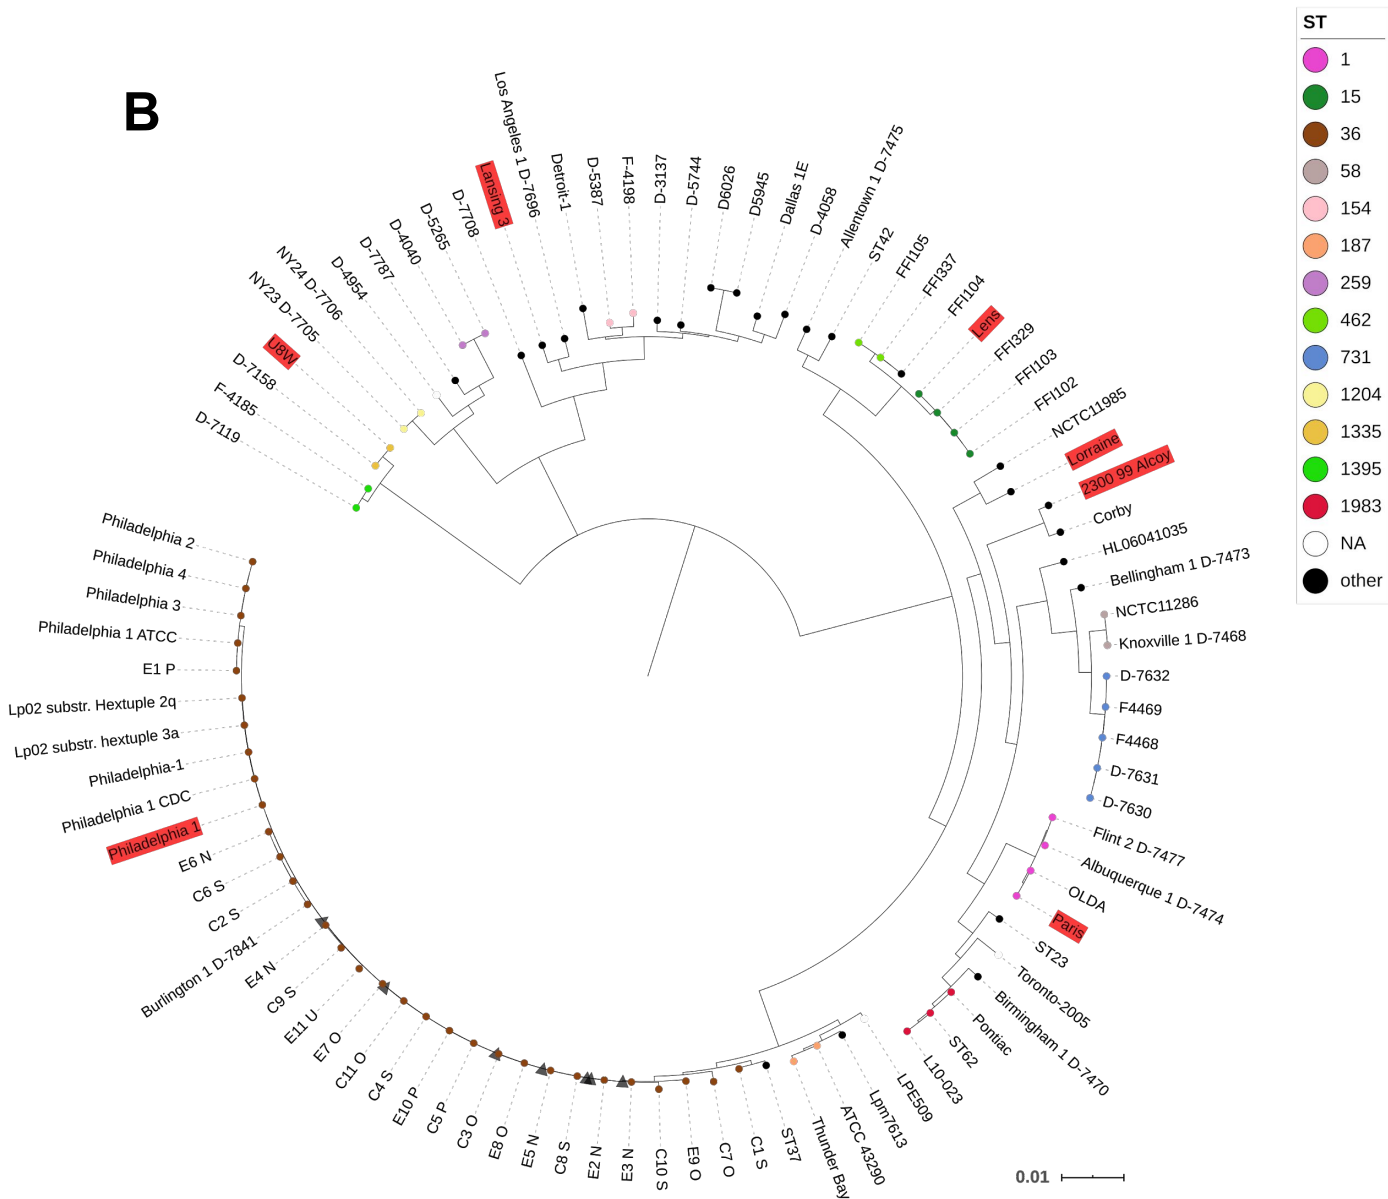

C

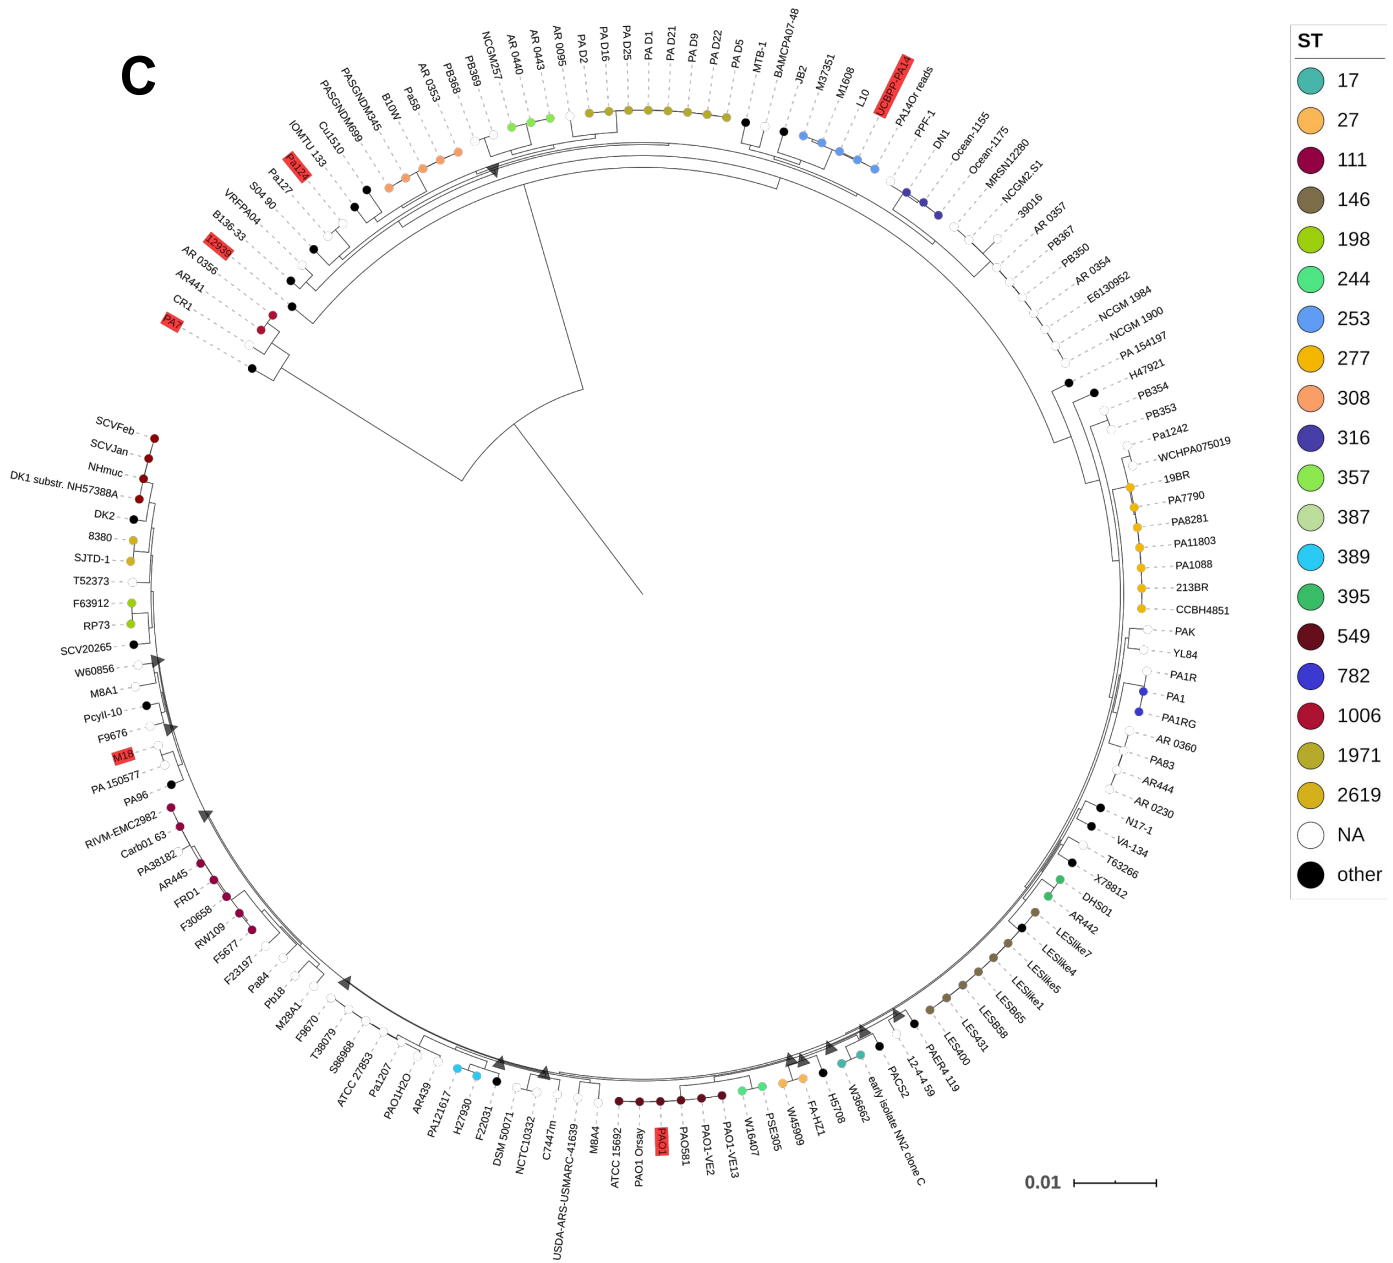

D

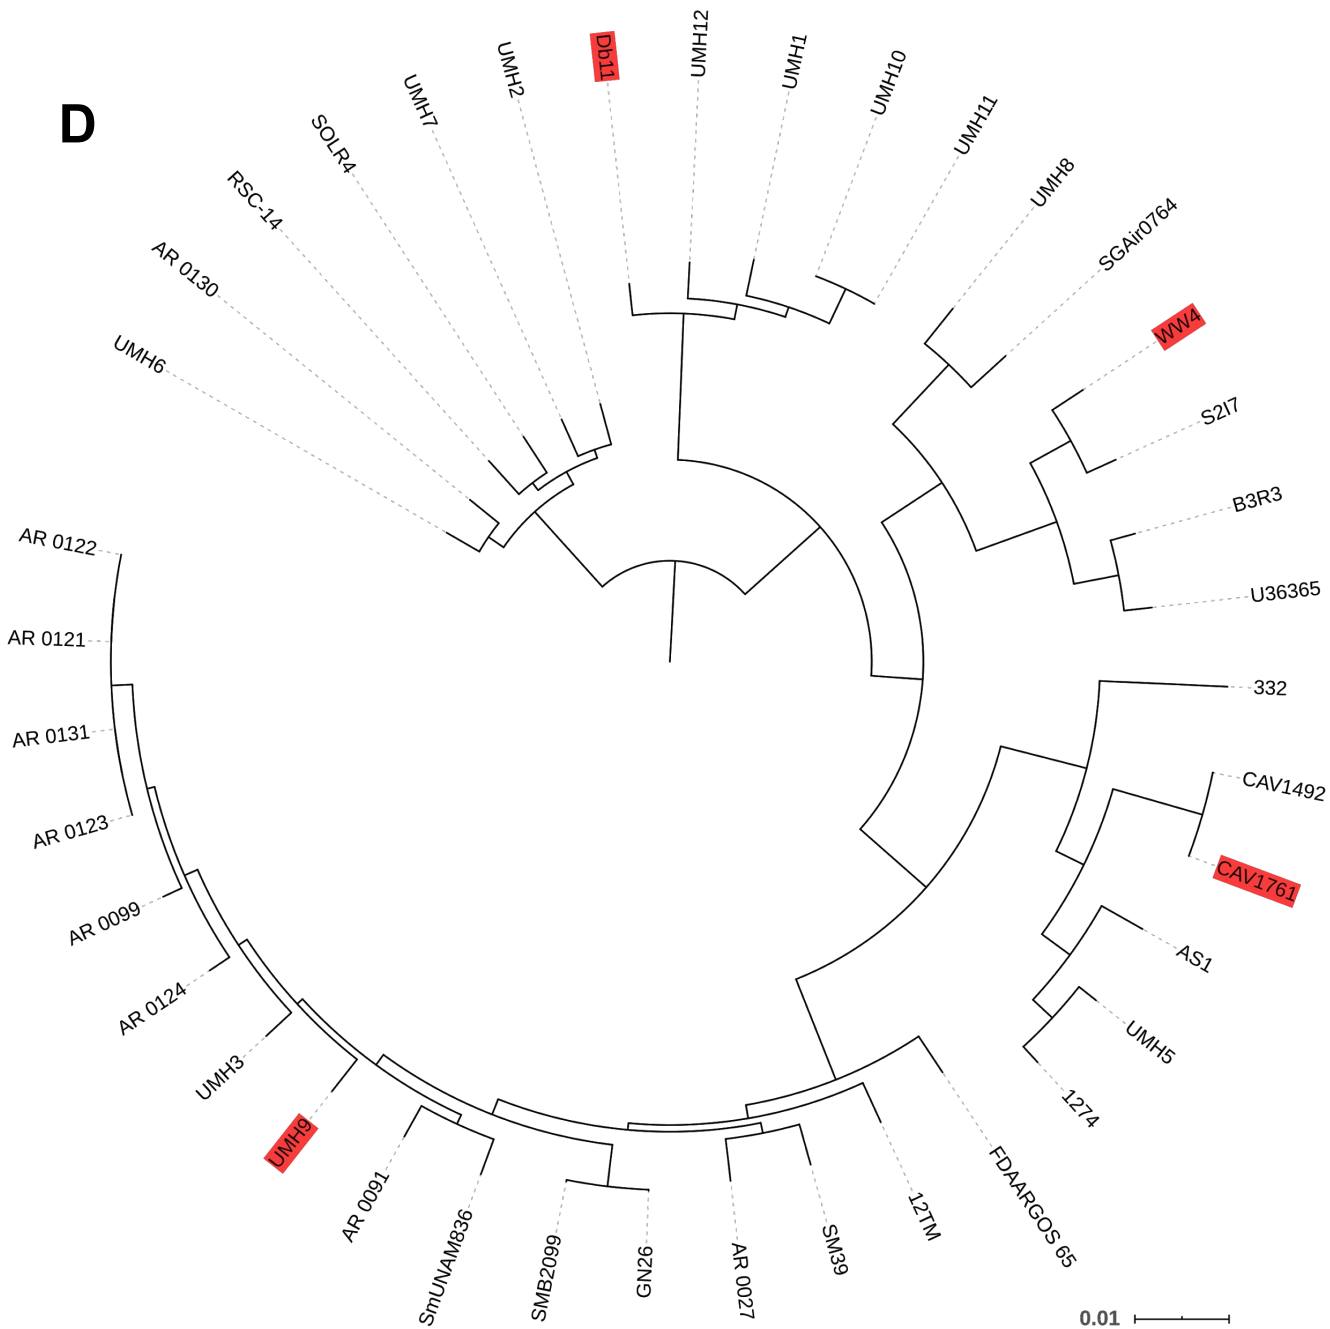

E

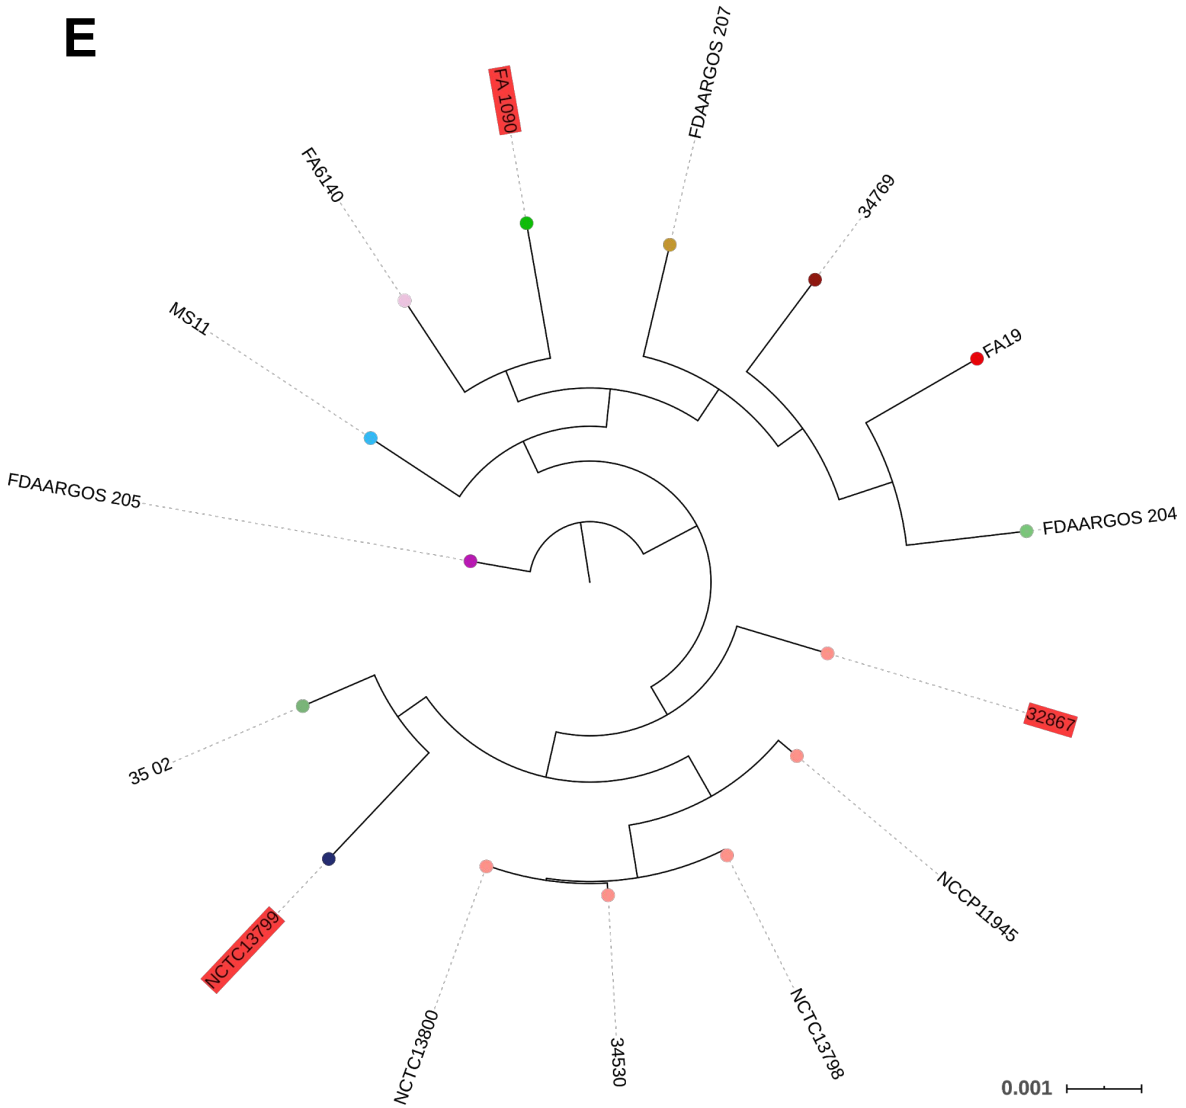

Supplement: pcbi.1008678.s001.pdf [file pcbi.1008678.s001.pdf]
